# Supplementary material
Source: publisher figshare collection journal article supplement (https://rs.figshare.com/ndownloader/files/14789567)
Supplement: Supplementary file 1 [file 14789567]

## Sheet: Experiment1
Subject	Session	Trial	Baited/Point	Opens	Correct
Eva	1	1	L	L	1
Eva	1	2	R	R	1
Eva	1	3	R	R	1
Eva	1	4	L	L	1
Eva	1	5	R	R	1
Eva	1	6	R	R	1
Eva	1	2repeat	L	L	1
Eva	2	7	R	R	1
Eva	2	8	L	L	1
Eva	2	9	R	L	0
Eva	2	10	L	L	1
Eva	2	11	L	L	1
Eva	2	12	R	R	1
Vicky	1	1	R	L	0
Vicky	1	2	R	R	1
Vicky	1	3	L	L	1
Vicky	1	4	R	L	0
Vicky	1	5	L	L	1
Vicky	1	6	L	L	1
Vicky	2	1	L	L	1
Vicky	2	2	R	L	0
Vicky	2	3	L	L	1
Vicky	2	4	R	L	0
Vicky	2	5	R	L	0
Vicky	2	6	L	L	1
Alikaka	1	1	L	L	1
Alikaka	1	2	R	R	1
Alikaka	1	3	L	L	1
Alikaka	1	4	R	L	0
Alikaka	1	5	R	L	0
Alikaka	1	6	L	L	1
Alikaka	2	1	R	R	1
Alikaka	2	2	R	R	1
Alikaka	2	3	L	R	0
Alikaka	2	4	L	L	1
Alikaka	2	5	R	L	0
Alikaka	2	6	L	L	1
Amahirwe	1	1	R	R	1
Amahirwe	1	2	L	L	1
Amahirwe	1	3	L	L	1
Amahirwe	1	4	R	R	1
Amahirwe	1	5	L	L	1
Amahirwe	1	6	R	R	1
Amahirwe	2	1	L	L	1
Amahirwe	2	2	R	R	1
Amahirwe	2	3	L	L	1
Amahirwe	2	4	R	R	1
Amahirwe	2	5	R	R	1
Amahirwe	2	6	L	L	1
Cheetah	1	1	L	L	1
Cheetah	1	2	L	L	1
Cheetah	1	3	R	R	1
Cheetah	1	4	L	L	1
Cheetah	1	5	R	R	1
Cheetah	1	6	R	R	1
Cheetah	2	1	R	R	1
Cheetah	2	2	L	L	1
Cheetah	2	3	R	R	1
Cheetah	2	4	L	L	1
Cheetah	2	5	L	L	1
Cheetah	2	6	R	R	1
Julia	1	1	R	R	1
Julia	1	2	L	L	1
Julia	1	3	R	R	1
Julia	1	4	L	L	1
Julia	1	5	L	L	1
Julia	1	6	R	L	0
Julia	2	1	L	L	1
Julia	2	2	L	L	1
Julia	2	3	R	L	0
Julia	2	4	R	R	1
Julia	2	5	L	L	1
Julia	2	6	R	L	0
Jojo	1	1	R	L	0
Jojo	1	2	L	L	1
Jojo	1	3	L	L	1
Jojo	1	4	R	R	1
Jojo	1	5	L	R	0
Jojo	1	6	R	L	0
Jojo	2	1	L	L	1
Jojo	2	2	R	R	1
Jojo	2	3	L	L	1
Jojo	2	4	R	R	1
Jojo	2	5	R	R	1
Jojo	2	6	L	R	0
Zee	1	1	L	L	1
Zee	1	2	L	R	0
Zee	1	3	R	R	1
Zee	1	4	L	L	1
Zee	1	5	R	R	1
Zee	1	6	R	R	1
Zee	2	1	R	R	1
Zee	2	2	L	R	0
Zee	2	3	R	L	0
Zee	2	4	L	L	1
Zee	2	5	L	L	1
Zee	2	6	R	L	0
George	1	1	R	L	0
George	1	2	L	L	1
George	1	3	R	R	1
George	1	4	L	L	1
George	1	5	L	L	1
George	1	6	R	R	1
George	2	1	L	L	1
George	2	2	L	L	1
George	2	3	R	R	1
George	2	4	R	R	1
George	2	5	L	L	1
George	2	6	R	R	1

## Sheet: Experiment2
Dyad	Order	Communicator	Recipient	C-Key	Trial	Condition	Baited	Communication	Success
1	1	Alikaka	Eva	0	1	Test	R	0	0
1	1	Alikaka	Eva	0	3	Control	R	0
1	1	Alikaka	Eva	0	5	Test	L	0	1
1	1	Alikaka	Eva	0	6	Control	L	0
1	1	Alikaka	Eva	1	2	Control	L	0
1	1	Alikaka	Eva	1	3	Test	L	1	0
1	1	Alikaka	Eva	1	4	Control	R	0
1	1	Alikaka	Eva	1	6	Test	R	0	0
1	1	Alikaka	Eva	0	1	Control	L	0
1	1	Alikaka	Eva	0	2	Test	R	1	1
1	1	Alikaka	Eva	0	4	Test	L	1	0
1	1	Alikaka	Eva	0	5	Control	R	0
1	1	Alikaka	Eva	1	1	Test	L	0	1
1	1	Alikaka	Eva	1	2	Control	R	0
1	1	Alikaka	Eva	1	4	Control	L	1
1	1	Alikaka	Eva	1	6	Test	R	1	1
1	1	Alikaka	Eva	0	1	Control	L	0
1	1	Alikaka	Eva	0	3	Test	L	0	0
1	1	Alikaka	Eva	0	4	Test	R	1	0
1	1	Alikaka	Eva	0	5	Control	R	0
1	1	Alikaka	Eva	1	2	Control	R	0
1	1	Alikaka	Eva	1	4	Test	L	1	1
1	1	Alikaka	Eva	1	5	Control	L	0
1	1	Alikaka	Eva	1	6	Test	R	1	0
2	1	Zee	Amahirwe	0	1	Control	L	0
2	1	Zee	Amahirwe	0	2	Test	R	0	0
2	1	Zee	Amahirwe	0	4	Test	L	0	0
2	1	Zee	Amahirwe	0	5	Control	R	0
2	1	Zee	Amahirwe	1	1	Test	L	0	0
2	1	Zee	Amahirwe	1	2	Control	R	1
2	1	Zee	Amahirwe	1	4	Control	L	0
2	1	Zee	Amahirwe	1	6	Test	R	0	1
2	1	Zee	Amahirwe	0	1	Test	R	1	1
2	1	Zee	Amahirwe	0	3	Control	R	0
2	1	Zee	Amahirwe	0	5	Test	L	1	0
2	1	Zee	Amahirwe	0	6	Control	L	0
2	1	Zee	Amahirwe	1	2	Control	L	0
2	1	Zee	Amahirwe	1	3	Test	L	0	1
2	1	Zee	Amahirwe	1	4	Control	R	0
2	1	Zee	Amahirwe	1	6	Test	R	1	1
2	1	Zee	Amahirwe	0	1	Control	L	0
2	1	Zee	Amahirwe	0	3	Test	L	1	0
2	1	Zee	Amahirwe	0	4	Test	R	1	1
2	1	Zee	Amahirwe	0	5	Control	R	0
2	1	Zee	Amahirwe	1	2	Test	L	1	1
2	1	Zee	Amahirwe	1	3	Control	R	0
2	1	Zee	Amahirwe	1	5	Test	R	1	1
2	1	Zee	Amahirwe	1	6	Control	L	0
3	1	Alley	Cheetah	0	1	Control	L	0
3	1	Alley	Cheetah	0	3	Test	L	0	0
3	1	Alley	Cheetah	0	4	Test	R	0	0
3	1	Alley	Cheetah	0	5	Control	R	1
3	1	Alley	Cheetah	1	1	Control	R	0
3	1	Alley	Cheetah	1	2	Test	L	1	0
3	1	Alley	Cheetah	1	5	Test	R	0	0
3	1	Alley	Cheetah	1	6	Control	L	0
3	1	Alley	Cheetah	0	3	Control	R	0
3	1	Alley	Cheetah	0	5	Test	L	0	0
3	1	Alley	Cheetah	0	6	Control	L	0
3	1	Alley	Cheetah	0	7	Test	R	0	1
3	1	Alley	Cheetah	1	2	Control	L	1
3	1	Alley	Cheetah	1	3	Test	L	0	1
3	1	Alley	Cheetah	1	4	Control	R	0
3	1	Alley	Cheetah	1	6	Test	R	0	0
3	1	Alley	Cheetah	0	2	Test	L	1	0
3	1	Alley	Cheetah	0	3	Control	R	0
3	1	Alley	Cheetah	0	4	Test	R	0	1
3	1	Alley	Cheetah	0	5	Control	L	0
3	1	Alley	Cheetah	1	1	Control	L	0
3	1	Alley	Cheetah	1	2	Test	R	1	1
3	1	Alley	Cheetah	1	4	Test	L	0	0
3	1	Alley	Cheetah	1	5	Control	R	0
2	2	Amahirwe	Zee	0	1	Test	R	0	1
2	2	Amahirwe	Zee	0	3	Control	R	0
2	2	Amahirwe	Zee	0	5	Test	L	0	0
2	2	Amahirwe	Zee	0	6	Control	L	0
2	2	Amahirwe	Zee	1	2	Control	L	0
2	2	Amahirwe	Zee	1	3	Test	L	0	0
2	2	Amahirwe	Zee	1	4	Control	R	0
2	2	Amahirwe	Zee	1	6	Test	R	0	0
2	2	Amahirwe	Zee	0	1	Control	L	0
2	2	Amahirwe	Zee	0	2	Test	R	1	1
2	2	Amahirwe	Zee	0	4	Test	L	0	0
2	2	Amahirwe	Zee	0	5	Control	R	0
2	2	Amahirwe	Zee	1	1	Test	L	1	1
2	2	Amahirwe	Zee	1	2	Control	R	0
2	2	Amahirwe	Zee	1	4	Control	L	0
2	2	Amahirwe	Zee	1	6	Test	R	0	0
2	2	Amahirwe	Zee	0	1	Control	L	0
2	2	Amahirwe	Zee	0	3	Test	L	1	0
2	2	Amahirwe	Zee	0	4	Test	R	1	1
2	2	Amahirwe	Zee	0	5	Control	R	0
2	2	Amahirwe	Zee	1	2	Test	L	1	0
2	2	Amahirwe	Zee	1	3	Control	R	0
2	2	Amahirwe	Zee	1	5	Test	R	0	0
2	2	Amahirwe	Zee	1	6	Control	L	0
1	2	Eva	Alikaka	0	1	Control	L	0
1	2	Eva	Alikaka	0	3	Test	L	1	1
1	2	Eva	Alikaka	0	4	Test	R	1	1
1	2	Eva	Alikaka	0	5	Control	R	0
1	2	Eva	Alikaka	1	2	Test	L	1	0
1	2	Eva	Alikaka	1	3	Control	R	0
1	2	Eva	Alikaka	1	5	Test	R	1	1
1	2	Eva	Alikaka	1	6	Control	L	1
1	2	Eva	Alikaka	0	1	Test	R	1	1
1	2	Eva	Alikaka	0	3	Control	R	1
1	2	Eva	Alikaka	0	5	Test	L	0	0
1	2	Eva	Alikaka	0	6	Control	L	0
1	2	Eva	Alikaka	1	2	Control	L	0
1	2	Eva	Alikaka	1	3	Test	L	0	0
1	2	Eva	Alikaka	1	4	Control	R	0
1	2	Eva	Alikaka	1	6	Test	R	0	0
1	2	Eva	Alikaka	0	1	Control	L	0
1	2	Eva	Alikaka	0	2	Test	R	1	1
1	2	Eva	Alikaka	0	4	Test	L	1	0
1	2	Eva	Alikaka	0	5	Control	R	0
1	2	Eva	Alikaka	1	1	Test	L	1	1
1	2	Eva	Alikaka	1	2	Control	R	0
1	2	Eva	Alikaka	1	4	Control	L	0
1	2	Eva	Alikaka	1	6	Test	R	1	1
3	2	Cheetah	Alley	0	2	Test	L	0	1
3	2	Cheetah	Alley	0	3	Control	R	0
3	2	Cheetah	Alley	0	5	Test	R	0	0
3	2	Cheetah	Alley	0	6	Control	L	0
3	2	Cheetah	Alley	1	1	Control	L	0
3	2	Cheetah	Alley	1	3	Test	L	1	1
3	2	Cheetah	Alley	1	4	Test	R	0	0
3	2	Cheetah	Alley	1	5	Control	R	0
3	2	Cheetah	Alley	0	1	Control	L	0
3	2	Cheetah	Alley	0	3	Test	L	0	1
3	2	Cheetah	Alley	0	4	Control	R	0
3	2	Cheetah	Alley	0	5	Test	R	0	0
3	2	Cheetah	Alley	1	1	Test	L	1	1
3	2	Cheetah	Alley	1	2	Control	R	0
3	2	Cheetah	Alley	1	4	Control	L	1
3	2	Cheetah	Alley	1	5	Test	R	1	0
3	2	Cheetah	Alley	0	1	Test	R	0	0
3	2	Cheetah	Alley	0	3	Control	R	0
3	2	Cheetah	Alley	0	5	Test	L	1	1
3	2	Cheetah	Alley	0	6	Control	L	0
3	2	Cheetah	Alley	1	1	Control	L	0
3	2	Cheetah	Alley	1	2	Test	R	0	0
3	2	Cheetah	Alley	1	3	Control	R	0
3	2	Cheetah	Alley	1	4	Test	L	1	1
4	1	Julia	Vicky	0	1	Control	L	1
4	1	Julia	Vicky	0	2	Test	R	0	1
4	1	Julia	Vicky	0	4	Test	L	0	0
4	1	Julia	Vicky	0	5	Control	R	0
4	1	Julia	Vicky	1	1	Test	L	0	0
4	1	Julia	Vicky	1	2	Control	R	0
4	1	Julia	Vicky	1	4	Control	L	0
4	1	Julia	Vicky	1	6	Test	R	1	0
4	1	Julia	Vicky	0	1	Control	L	0
4	1	Julia	Vicky	0	3	Test	L	0	0
4	1	Julia	Vicky	0	4	Test	R	0	0
4	1	Julia	Vicky	0	5	Control	R	0
4	1	Julia	Vicky	1	2	Test	L	0	1
4	1	Julia	Vicky	1	3	Control	R	0
4	1	Julia	Vicky	1	5	Test	R	1	1
4	1	Julia	Vicky	1	6	Control	L	0
4	1	Julia	Vicky	0	1	Test	R	1	1
4	1	Julia	Vicky	0	3	Control	R	0
4	1	Julia	Vicky	0	5	Test	L	1	0
4	1	Julia	Vicky	0	6	Control	L	1
4	1	Julia	Vicky	1	2	Control	L	0
4	1	Julia	Vicky	1	3	Test	L	1	0
4	1	Julia	Vicky	1	4	Control	R	0
4	1	Julia	Vicky	1	6	Test	R	1	1
4	2	Vicky	Julia	0	1	Control	L	1
4	2	Vicky	Julia	0	3	Test	L	0	1
4	2	Vicky	Julia	0	4	Test	R	0	1
4	2	Vicky	Julia	0	5	Control	R	0
4	2	Vicky	Julia	1	2	Test	L	1	1
4	2	Vicky	Julia	1	3	Control	R	1
4	2	Vicky	Julia	1	5	Test	R	1	0
4	2	Vicky	Julia	1	6	Control	L	0
4	2	Vicky	Julia	0	1	Test	R	0	1
4	2	Vicky	Julia	0	3	Control	R	1
4	2	Vicky	Julia	0	5	Test	L	1	0
4	2	Vicky	Julia	0	6	Control	L	0
4	2	Vicky	Julia	1	2	Control	L	0
4	2	Vicky	Julia	1	3	Test	L	1	1
4	2	Vicky	Julia	1	4	Control	R	0
4	2	Vicky	Julia	1	6	Test	R	1	0
4	2	Vicky	Julia	0	1	Control	L	0
4	2	Vicky	Julia	0	2	Test	R	1	1
4	2	Vicky	Julia	0	4	Test	L	0	0
4	2	Vicky	Julia	0	5	Control	R	1
4	2	Vicky	Julia	1	1	Test	L	1	0
4	2	Vicky	Julia	1	2	Control	R	0
4	2	Vicky	Julia	1	4	Control	L	1
4	2	Vicky	Julia	1	6	Test	R	1	1
5	1	George	Jojo	0	1	Test	R	1	1
5	1	George	Jojo	0	3	Control	R	1
5	1	George	Jojo	0	5	Test	L	1	1
5	1	George	Jojo	0	6	Control	L	1
5	1	George	Jojo	1	2	Control	L	1
5	1	George	Jojo	1	3	Test	L	0	0
5	1	George	Jojo	1	4	Control	R	0
5	1	George	Jojo	1	6	Test	R	1	1
5	1	George	Jojo	0	1	Control	L	1
5	1	George	Jojo	0	2	Test	R	1	1
5	1	George	Jojo	0	4	Test	L	0	0
5	1	George	Jojo	0	5	Control	R	1
5	1	George	Jojo	1	1	Test	L	1	1
5	1	George	Jojo	1	2	Control	R	0
5	1	George	Jojo	1	4	Control	L	0
5	1	George	Jojo	1	6	Test	R	0	0
5	1	George	Jojo	0	1	Control	L	0
5	1	George	Jojo	0	3	Test	L	1	0
5	1	George	Jojo	0	4	Test	R	1	0
5	1	George	Jojo	0	5	Control	R	1
5	1	George	Jojo	1	2	Test	L	1	0
5	1	George	Jojo	1	3	Control	R	0
5	1	George	Jojo	1	5	Test	R	0	0
5	1	George	Jojo	1	6	Control	L	0
5	2	Jojo	George	0	1	Control	L	1
5	2	Jojo	George	0	2	Test	R	0	0
5	2	Jojo	George	0	4	Test	L	0	1
5	2	Jojo	George	0	5	Control	R	1
5	2	Jojo	George	1	1	Test	L	0
5	2	Jojo	George	1	2	Control	R	0
5	2	Jojo	George	1	4	Control	L	0
5	2	Jojo	George	1	6	Test	R	0
5	2	Jojo	George	0	1	Control	L	1
5	2	Jojo	George	0	3	Test	L	1	0
5	2	Jojo	George	0	4	Test	R	1	0
5	2	Jojo	George	0	5	Control	R	0
5	2	Jojo	George	1	2	Test	L	0
5	2	Jojo	George	1	3	Control	R	0
5	2	Jojo	George	1	5	Test	R	0
5	2	Jojo	George	1	6	Control	L	0
5	2	Jojo	George	0	1	Test	R	0	1
5	2	Jojo	George	0	3	Control	R	0
5	2	Jojo	George	0	5	Test	L	0	0
5	2	Jojo	George	0	6	Control	L	1
5	2	Jojo	George	1	2	Control	L	0
5	2	Jojo	George	1	3	Test	L	0
5	2	Jojo	George	1	4	Control	R	0
5	2	Jojo	George	1	6	Test	R	0

## Sheet: Experiment3
Dyad	Order	Communicator	Recipient	Session	Trial	Baited	Communication	Comm_BOX	Comcor	Opens	Reccor	Success
1	1	Alikaka	Eva	1	1	L	1	L	1	L	1	1
1	1	Alikaka	Eva	1	2	R	1	L	0	L	1	0
1	1	Alikaka	Eva	1	3	R	1	R	1	R	1	1
1	1	Alikaka	Eva	1	4	L	1	L	1	L	1	1
1	1	Alikaka	Eva	2	5	R	1	R	1	R	1	1
1	1	Alikaka	Eva	2	6	R	1	R	1	R	1	1
1	1	Alikaka	Eva	2	7	L	1	L	1	L	1	1
1	1	Alikaka	Eva	2	8	L	1	L	1	L	1	1
1	1	Alikaka	Eva	3	9	L	1	L	1	L	1	1
1	1	Alikaka	Eva	3	10	R	1	R	1	R	1	1
1	1	Alikaka	Eva	3	11	L	1	L	1	L	1	1
1	1	Alikaka	Eva	3	12	R	1	R	1	R	1	1
1	1	Alikaka	Eva	4	13	R	1	L	0	L	1	0
1	1	Alikaka	Eva	4	14	R	1	R	1	R	1	1
1	1	Alikaka	Eva	4	15	L	1	L	1	L	1	1
1	1	Alikaka	Eva	5	16	L	1	L	1	L	1	1
1	1	Alikaka	Eva	5	17	R	1	R	1	R	1	1
1	1	Alikaka	Eva	5	18	L	1	L	1	L	1	1
1	2	Eva	Alikaka	1	1	R	1	R	1	L	0	0
1	2	Eva	Alikaka	1	2	L	1	L	1		0	0
1	2	Eva	Alikaka	1	3	L	1	L	1	R	0	0
1	2	Eva	Alikaka	1	4	R	1	R	1	R	1	1
1	2	Eva	Alikaka	2	5	L	1	L	1	L	1	1
1	2	Eva	Alikaka	2	6	R	1	R	1	L	0	0
1	2	Eva	Alikaka	2	7	R	1	R	1	R	1	1
1	2	Eva	Alikaka	2	8	L	1	L	1	L	1	1
1	2	Eva	Alikaka	3	9	R	1	R	1	R	1	1
1	2	Eva	Alikaka	3	10	R	1	R	1	R	1	1
1	2	Eva	Alikaka	3	11	L	1	R	0	R	1	0
1	2	Eva	Alikaka	3	12	L	1	L	1	L	1	1
1	2	Eva	Alikaka	4	13	R	1	L	0	L	1	0
1	2	Eva	Alikaka	4	14	R	1	R	1	R	1	1
1	2	Eva	Alikaka	4	15	L	1	L	1	L	1	1
1	2	Eva	Alikaka	5	16	L	1	L	1	L	1	1
1	2	Eva	Alikaka	5	17	R	1	R	1	R	1	1
1	2	Eva	Alikaka	5	18	L	1	L	1	L	1	1
2	1	Zee	Amahirwe	1	1	R	1	R	1	R	1	1
2	1	Zee	Amahirwe	1	2	L	1	L	1	R	0	0
2	1	Zee	Amahirwe	1	3	L	1	L	1	L	1	1
2	1	Zee	Amahirwe	1	4	R	1	R	1	R	1	1
2	1	Zee	Amahirwe	2	5	L	0		0	L	0	1
2	1	Zee	Amahirwe	2	6	R	1	R	1	R	1	1
2	1	Zee	Amahirwe	2	7	L	0		0	R		0
2	1	Zee	Amahirwe	2	8	R	1	R	1	R	1	1
2	1	Zee	Amahirwe	3	9	L	1	L	1	L	1	1
2	1	Zee	Amahirwe	3	10	R	1	R	1	R	1	1
2	1	Zee	Amahirwe	3	11	R	1	R	1	R	1	1
2	1	Zee	Amahirwe	3	12	L	1	R	0	R	1	0
2	1	Zee	Amahirwe	4	13	L	1	L	1	L	1	1
2	1	Zee	Amahirwe	4	14	R	1	R	1	R	1	1
2	1	Zee	Amahirwe	4	15	R	1	R	1	R	1	1
2	1	Zee	Amahirwe	5	16	L	1	L	1	L	1	1
2	1	Zee	Amahirwe	5	17	R	1	R	1	L	0	0
2	1	Zee	Amahirwe	5	18	L	1	L	1	L	1	1
2	2	Amahirwe	Zee	1	1	L	0		0	L		1
2	2	Amahirwe	Zee	1	2	R	0		0	R		1
2	2	Amahirwe	Zee	1	3	R	1	L	0	L	1	0
2	2	Amahirwe	Zee	1	4	L	0		0	L		1
2	2	Amahirwe	Zee	2	5	R	0		0	L		0
2	2	Amahirwe	Zee	2	6	L	0		0	L		1
2	2	Amahirwe	Zee	2	7	R	1	R	1	R	1	1
2	2	Amahirwe	Zee	2	8	L	1	L	1	L	1	1
2	2	Amahirwe	Zee	3	9	L	1	L	1	L	1	1
2	2	Amahirwe	Zee	3	10	R	0		0	L		0
2	2	Amahirwe	Zee	3	11	L	1	L	1	L	1	1
2	2	Amahirwe	Zee	3	12	R	0		0	L		0
2	2	Amahirwe	Zee	4	13	R	0		0	L		0
2	2	Amahirwe	Zee	4	14	L	0		0	L		1
2	2	Amahirwe	Zee	4	15	R	0		0	L		0
2	2	Amahirwe	Zee	5	16	L	0		0	R		0
2	2	Amahirwe	Zee	5	17	R	0		0	L		0
2	2	Amahirwe	Zee	5	18	L	0		0	L		1
3	1	George	Jojo	1	1	L	1	L	1	L	1	1
3	1	George	Jojo	1	2	R	1	R	1	L	0	0
3	1	George	Jojo	1	3	L	1	L	1		0
3	1	George	Jojo	1	4	R	1	R	1	L	0	0
3	1	George	Jojo	1	5	R	1	R	1	R	1	1
3	1	George	Jojo	1	6	L	1	L	1	R	0	0
3	1	George	Jojo	2	7	R	1	R	1	R	1	1
3	1	George	Jojo	2	8	R	1	R	1	R	1	1
3	1	George	Jojo	2	9	L	1	L	1	L	0	0
3	1	George	Jojo	2	10	R	1	R	1	R	1	1
3	1	George	Jojo	2	11	L	1	L	1	L	1	1
3	1	George	Jojo	2	12	L	1	L	1	L	1	1
3	1	George	Jojo	3	13	L	1	L	1	L	1	1
3	1	George	Jojo	3	14	R	1	R	1	R	1	1
3	1	George	Jojo	3	15	L	1	L	1	L	1	1
3	1	George	Jojo	3	16	R	0		0	R		1
3	1	George	Jojo	3	17	R	0		0	L		0
3	1	George	Jojo	3	18	L	1	L	1	R	0	0
4	2	Jojo	Cheetah	1	1	L	1	R	0	L	0	1
4	2	Jojo	Cheetah	1	2	L	1	L	1	L	1	1
4	2	Jojo	Cheetah	1	3	R	0		0	L		0
4	2	Jojo	Cheetah	1	4	R	0		0	R		1
4	2	Jojo	Cheetah	1	5	L	0		0	L		1
4	2	Jojo	Cheetah	1	6	R	0		0	L		0
4	2	Jojo	Cheetah	2	7	R	0		0	R		1
4	2	Jojo	Cheetah	2	8	L	1	L	1	R	0	0
4	2	Jojo	Cheetah	2	9	R	0		0	L		0
4	2	Jojo	Cheetah	2	10	L	1	R	0	R	1	0
4	2	Jojo	Cheetah	2	11	L	1	L	1	L	1	1
4	2	Jojo	Cheetah	2	12	R	0		0	L		0
4	2	Jojo	Cheetah	3	13	L	0		0	L		1
4	2	Jojo	Cheetah	3	14	R	1	L	0	L	1	0
4	2	Jojo	Cheetah	3	15	L	0		0	R		0
4	2	Jojo	Cheetah	3	16	R	1	R	1	L	0	0
4	2	Jojo	Cheetah	3	17	R	1	R	1	L	0	0
4	2	Jojo	Cheetah	3	18	L	0		0	L		1
5	2	Alikaka	George	1	1	R	1	R	1	R	1	1
5	2	Alikaka	George	2	2	L	1	L	1	L	1	1
5	2	Alikaka	George	2	3	R	1	R	1	R	1	1
5	2	Alikaka	George	2	4	L	1	L	1	R	0	0
5	2	Alikaka	George	2	5	L	1	L	1	R	0	0
5	2	Alikaka	George	2	6	R	1	R	1	R	1	1
5	2	Alikaka	George	2	7	L	1	L	1	R	0	0
5	2	Alikaka	George	3	8	L	1	L	1	R	0	0
5	2	Alikaka	George	3	9	R	1	R	1	R	1	1
5	2	Alikaka	George	3	10	L	1	L	1	R	0	0
5	2	Alikaka	George	3	11	L	1	L	1	L	1	1
5	2	Alikaka	George	3	12	R	1	R	1	R	1	1
5	2	Alikaka	George	4	13	R	1	R	1	R	1	1
5	2	Alikaka	George	4	14	L	1	L	1	R	0	0
5	2	Alikaka	George	4	15	R	1	R	1	R	1	1
5	2	Alikaka	George	4	16	L	1	L	1	R	0	0
5	2	Alikaka	George	4	17	R	1	R	1	R	1	1
5	2	Alikaka	George	4	18	R	1	R	1		1	1
6	1	Alley	Cheetah	1	1	R	1	R	1	R	1	1
6	1	Alley	Cheetah	1	2	L	1	L	1	L	1	1
6	1	Alley	Cheetah	1	3	L	0		0	L		1
6	1	Alley	Cheetah	1	4	R	1	R	1	R	1	1
6	1	Alley	Cheetah	1	5	L	1	L	1	L	1	1
6	1	Alley	Cheetah	1	6	R	1	R	1	R	1	1
6	1	Alley	Cheetah	2	7	L	1	L	1	R	0	0
6	1	Alley	Cheetah	2	8	R	1	R	1	R	1	1
6	1	Alley	Cheetah	2	9	L	1	L	1	R	0	0
6	1	Alley	Cheetah	2	10	L	1	L	1	L	1	1
6	1	Alley	Cheetah	2	11	R	1	R	1	R	1	1
6	1	Alley	Cheetah	2	12	R	1	R	1	R	1	1
6	1	Alley	Cheetah	3	13	R	0		0	R		1
6	1	Alley	Cheetah	3	14	L	0		0	L		1
6	1	Alley	Cheetah	3	15	L	1	L	1	L	1	1
6	1	Alley	Cheetah	3	16	R	1	R	1	R	1	1
6	1	Alley	Cheetah	3	17	L	1	L	1	L	1	1
6	1	Alley	Cheetah	3	18	R	1	L	0	L	1	0
7	1	Julia	Vicky	1	1	L	1	L	1	L	1	1
7	1	Julia	Vicky	1	2	R	1	R	1	R	1	1
7	1	Julia	Vicky	1	3	R	1	R	1	R	1	1
7	1	Julia	Vicky	1	4	L	1	L	1	R	0	0
7	1	Julia	Vicky	1	5	L	1	L	1	R	0	0
7	1	Julia	Vicky	1	6	R	1	R	1	R	1	1
7	1	Julia	Vicky	2	7	R	1	R	1	R	1	1
7	1	Julia	Vicky	2	8	L	1	L	1	R	0	0
7	1	Julia	Vicky	2	9	R	1	R	1	R	1	1
7	1	Julia	Vicky	2	10	R	1	R	1	R	1	1
7	1	Julia	Vicky	2	11	L	0		0	R		0
7	1	Julia	Vicky	2	12	L	1	R	0	R	1	0
7	1	Julia	Vicky	3	13	R	1	R	1	R	1	1
7	1	Julia	Vicky	3	14	L	1	L	1	R	0	0
7	1	Julia	Vicky	3	15	L	1	L	1	L	1	1
7	1	Julia	Vicky	3	16	R	1	R	1	R	1	1
7	1	Julia	Vicky	3	17	L	1	L	1	R	0	0
7	1	Julia	Vicky	3	18	R	1	R	1	R	1	1
7	2	Vicky	Julia	1	1	L	1	L	1	L	1	1
7	2	Vicky	Julia	1	2	R	1	L	0	L	1	0
7	2	Vicky	Julia	1	3	R	1	R	1	R	1	1
7	2	Vicky	Julia	1	4	L	1	R	0	R	1	0
7	2	Vicky	Julia	1	5	L	1	L	1	L	1	1
7	2	Vicky	Julia	1	6	R	1	R	1	R	1	1
7	2	Vicky	Julia	2	7	R	1	R	1	R	1	1
7	2	Vicky	Julia	2	8	L	1	L	1	R	0	0
7	2	Vicky	Julia	2	9	L	1	L	1	L	1	1
7	2	Vicky	Julia	2	10	R	1	R	1	R	1	1
7	2	Vicky	Julia	2	11	L	1	L	1	L	1	1
7	2	Vicky	Julia	2	12	R	1	R	1	L	0	0
7	2	Vicky	Julia	3	13	L	1	L	1	L	1	1
7	2	Vicky	Julia	3	14	R	1	R	1	R	1	1
7	2	Vicky	Julia	3	15	L	1	L	1	L	1	1
7	2	Vicky	Julia	3	16	R	1	R	1	R	1	1
7	2	Vicky	Julia	3	17	R	1	R	1	R	1	1
7	2	Vicky	Julia	3	18	L	1	L	1	L	1	1
6	2	Cheetah	Alley	1	1	L	1	L	1	L	1	1
6	2	Cheetah	Alley	1	2	R	1	R	1	L	0	0
6	2	Cheetah	Alley	2	3	R	1	R	1	R	1	1
6	2	Cheetah	Alley	2	4	L	0		0	L		1
6	2	Cheetah	Alley	2	5	R	0		0	L		0
6	2	Cheetah	Alley	3	6	L	1	L	1	L	1	1
6	2	Cheetah	Alley	3	7	R	1	L	0	L	1	0
6	2	Cheetah	Alley	3	8	R	1	L	0	L	1	0
6	2	Cheetah	Alley	3	9	L	1	L	1	L	1	1
6	2	Cheetah	Alley	3	10	R	1	L	0	R	0	1
6	2	Cheetah	Alley	4	11	L	1	L	1	L	1	1
6	2	Cheetah	Alley	4	12	L	1	L	1	L	1	1
6	2	Cheetah	Alley	4	13	R	1	L	0	L	1	0
6	2	Cheetah	Alley	4	14	R	0	R	1	L	0	0
6	2	Cheetah	Alley	4	15	L	1	L	1	L	1	1
6	2	Cheetah	Alley	5	16	R	1	L	0	L	1	0
6	2	Cheetah	Alley	5	17	L	1	L	1	L	1	1
6	2	Cheetah	Alley	5	18	L	1	L	1	L	1	1

## Sheet: Follow_upExp3
Subject	Trial	Baited	Correct
Bahati	1	L	1
Bahati	2	R	0
Bahati	3	L	1
Bahati	4	R	0
Bahati	5	R	0
Bahati	6	L	1
Bahati	7	R	1
Bahati	8	R	1
Bahati	9	L	1
Bahati	10	L	1
Bahati	11	R	1
Bahati	12	L	1
Bahati	13	R	0
Bahati	14	L	1
Bahati	15	R	0
Bahati	16	L	1
Bahati	17	L	1
Bahati	18	R	0
Amisero	1	R	1
Amisero	2	R	1
Amisero	3	L	1
Amisero	4	L	1
Amisero	5	R	1
Amisero	6	L	1
Amisero	7	L	1
Amisero	8	R	0
Amisero	9	L	1
Amisero	10	R	0
Amisero	11	R	0
Amisero	12	L	1
Amisero	13	L	1
Amisero	14	R	0
Amisero	15	R	1
Amisero	16	L	1
Amisero	17	R	0
Amisero	18	L	1
Joy	1	L	1
Joy	2	R	0
Joy	3	L	1
Joy	4	R	1
Joy	5	R	0
Joy	6	L	1
Joy	7	R	1
Joy	8	R	1
Joy	9	L	1
Joy	10	L	1
Joy	11	R	1
Joy	12	L	0
Joy	13	R	1
Joy	14	L	1
Joy	15	L	0
Joy	16	R	1
Joy	17	L	1
Joy	18	R	1
Tess	1	L	1
Tess	2	L	1
Tess	3	R	0
Tess	4	L	1
Tess	5	R	0
Tess	6	R	0
Tess	7	R	0
Tess	8	L	0
Tess	9	L	1
Tess	10	R	0
Tess	11	R	0
Tess	12	L	1
Tess	13	R	0
Tess	14	L	1
Tess	15	L	1
Tess	16	R	0
Tess	17	R	0
Tess	18	L	1
Dufa	1	L	1
Dufa	2	R	0
Dufa	3	L	1
Dufa	4	R	1
Dufa	5	R	1
Dufa	6	L	1
Dufa	7	R	1
Dufa	8	L	1
Dufa	9	L	1
Dufa	10	R	1
Dufa	11	R	1
Dufa	12	L	1
Dufa	13	L	1
Dufa	14	R	0
Dufa	15	L	1
Dufa	16	R	1
Dufa	17	R	1
Dufa	18	L	1
Roy	1	R	1
Roy	2	R	1
Roy	3	L	0
Roy	4	L	0
Roy	5	R	0
Roy	6	L	1
Roy	7	L	1
Roy	8	R	0
Roy	9	L	1
Roy	10	R	0
Roy	11	R	0
Roy	12	L	1
Roy	13	L	1
Roy	14	R	0
Roy	15	L	1
Roy	16	L	1
Roy	17	R	0
Roy	18	R	0
